**TITLE & AUTHORS' PAGE**

**Full title**

**Patient satisfaction in the use of non-pharmacological therapies in the management of postoperative pain: a study in a tertiary hospital, Ghana**

**Short title**

**Patient satisfaction and non-pharmacological therapies in postoperative pain management**

**Authors:**

Priscilla Felicia Tano<sup>1\*</sup> (Email: [pftano@gmail.com](mailto:pftano@gmail.com))

Felix Apiribu<sup>2</sup> (Email: [fapiribu@yahoo.com](mailto:fapiribu@yahoo.com))

Emile Kouakou Tano<sup>1</sup> (Email: [kanot2001@yahoo.com](mailto:kanot2001@yahoo.com))

Ramatu Agambire<sup>3</sup> (Email: [ragambire@yahoo.com](mailto:ragambire@yahoo.com))

Isaac Boateng<sup>4</sup> (Email: [iboat256@gmail.com](mailto:iboat256@gmail.com))

Victoria Sefah<sup>1</sup> (Email: [victoriasefah2g4@gmail.com](mailto:victoriasefah2g4@gmail.com))

<sup>1</sup> Department of Surgery, Komfo Anokye Teaching Hospital, Kumasi, Ghana.

<sup>2</sup> Department of Nursing, Faculty of Allied Health Science, College of Health Science, Kwame Nkrumah University of Science and Technology, Kumasi, Ghana.

<sup>3</sup> Department of Nursing, Garden City University College, Kumasi, Ghana

<sup>4</sup> Department of Physiology, University of Cape Coast.

24

25 **Correspondence:**

26 Priscilla Felicia Tano

27 [pftano@gmail.com](mailto:pftano@gmail.com)

28

29

30

31

32

33

34

35

36

37

38

39

40

41

42

## ABSTRACT

**Background:** Non-pharmacological therapies are the non-medicinal methods used in postoperative pain (POP) management by health care practitioners such as massage, positioning, breathing exercise, music therapy, and distraction. It has been discovered that therapies that are non-pharmacological for the relief of pain are effective with minimal side effects. Studies have also revealed that non-pharmacological interventions in the management of pain lessen or alter pain perception by decreasing intensity and intensifying the tolerance of pain. This study, therefore, seeks to determine how frequently non-pharmacological methods (NPMs) are used in the management of POP and the influence of these NPMs on patient satisfaction

**Methods:** This study was a descriptive cross-sectional design. A quantitative approach was utilized with a structured questionnaire to obtain responses from patients from October to December 2019. The study was conducted in the female and male surgical wards of Komfo Anokye Teaching Hospital (KATH) in Kumasi, Ghana. 138 patients within the first 72 hours post-operative period who consented and fulfilled the inclusion criteria were enrolled in the study. A convenience sampling method was used to collect the data. Inferential and descriptive statistics were used in analyzing the data.

**Results:** The majority of the patients, 52.2% responded to using some form of (NPMs) for pain relief. The most widely used non-pharmacological method of pain relief was walking representing 79.2%, followed by relaxation 5 (6.8%), distraction 4 (5.6%), listening to music 3 (4.2%), deep breathing 2 (2.8%), and meditation 1 (1.4%). The male participants were observed to use more NPMs of pain relief as compared to the females. Most of the patients (51.4%) who used NPMs for their pain relief reported having their pain not relieved. A majority (90.6%) of the

participants desired for more pain treatment. The type of surgery the patients underwent had a statistically significant negative correlation with the use of NPMs of pain relief (Spearman Correlation Coefficient = -0.233, p-value <0.05). A higher percentage (71%) of participants were highly satisfied with the overall pain treatment received.

**Conclusion:** Non-pharmacological management of POP have been proven to be efficient, inexpensive, and have little or no side effect on patients. There should be continuous education on non-pharmacological management of POP to nurses and other healthcare professionals to help promote the efficiency of intervening in postoperative pain with these methods.

**Key Words:** Non-pharmacological, pain management, therapies, postoperative pain, patient satisfaction,

## 84 Introduction

85 Pain treatment is considered a human right as treating pain seeks to gain velocity in WHO policy  
86 with this awareness [1]. Surgeries have played a pivotal role in managing and treating complex  
87 health challenges in patients requiring the process [2]. However, patients who go through  
88 surgical procedures, either minor or major, experience acute POP [3].

89 Globally the prevalence of POP differs among studies. For instance, the American Pain Society  
90 suggests a prevalence of more than 80% with 75% reporting moderate to severe pain [4]. Studies  
91 in Sub-Saharan Africa reveal that POP has been undertreated and the burden of POP ranges from  
92 40 to 95% [5,6]. In Ghana, patients who suffer inadequate POP is about 70% [7].

93 Uncontrolled POP is characterized by longer hospital stays, prolonged post-operative care, more  
94 readmission rates, and reduced patient satisfaction [8]. After both major and minor surgeries, the  
95 majority of patients have acute POP [9,10]. Study reveals that, POP treatment is not easy to  
96 effectively attain because pain is subjective, so finding the type of surgery can aid in achieving  
97 successful POP management [11].

98 Studies suggest that the treatment of POP is still unsatisfactory [1,5,12] even though  
99 pharmacological methods are in use for the treatment of pain [13].

100 Interventions that are not pharmacological are viewed to be therapies that do not include taking  
101 medications or other substances that are active [14,15]. More precisely, non-pharmacological  
102 therapies are the non-medicinal methods used in postoperative pain management by health care  
103 practitioners such as massage, positioning, breathing exercise, music therapy, and distraction. It

104 has been discovered that therapies that are not pharmacological for the relief of pain are effective  
105 with minimized side effects and complications [6].

106 Studies have shown that health care practitioners' attitude and lack of knowledge on the different  
107 types of non-pharmacological pain management makes the efficacious use of these measures  
108 questionable [6,16]. Previous studies also reveal that non-medicine interventions in the  
109 management of pain lessen or alter pain perception by decreasing intensity and intensifying the  
110 tolerance of pain, decreasing pain-related stress, changing pain behavior, reinforcing coping  
111 skills, and giving patient and relatives the feeling of control over the pain [17,18,19,20]

112 Non-pharmacological therapies can complement pharmacological therapies and present another  
113 treatment in post-operative pain management but such interventions are under-utilized [14,21].  
114 Using NPMs aids in the reduction of the intake of opioids and its possibly damaging  
115 physiological and psychological reactions to the pain [19].

116 When NPMs are employed as adjuvant treatment, they decrease the anxiety of the patient and  
117 increase patient satisfaction with POP management. Several studies on surgical procedures  
118 reported that these techniques led to a decreased analgesic use post-operatively, or a reduced  
119 pain intensity on Day 2 or 3 of post-operation [22].

120 NPMs of pain relief can be classified as;

- 121 1. Physical activities such as deep breathing, walking, or light to moderate sportive activities.
- 122 2. Psychological/spiritual interventions like meditation or relaxation, distraction such as listening  
123 to music or talking to people, praying, watching TV, stress management, visualization, hypnosis,  
124 and imagery.

3. Inactively used physical methods such as heat / cold packs, massaging, physiotherapy, transcutaneous electrical nerve stimulation (TENS), chiropractic, acupressure, and acupuncture. Clarity on the understanding of the use of NPMs in our sub-region and the effect on POP management as well as the patient satisfaction with the use of these therapies will be mentioned, as the aim of this study was to understand how frequent the types of NPMs are used, socio-demographics influence with the satisfaction of the use of NPMs in the management of POP, if NPMs used, is related to patients' wish for more pain treatment and the influence of NPMs on patient satisfaction.

## Methodology

### STUDY DESIGN AND STUDY SETTING

This research is part of a larger study of POP management in a tertiary hospital in Ghana where a descriptive cross-sectional design was utilized. A quantitative approach was employed utilizing a structured questionnaire to obtain responses from participants between October 2019 and December 2019. The study was conducted in the female and male surgical wards of Komfo Anokye Teaching Hospital (KATH) in Kumasi, Ghana.

### STUDY PARTICIPANTS, SAMPLING TECHNIQUE, AND SAMPLE SIZE

Post-operative clients within the first 72 hours post-operative period who consented were allowed to participate in the study. Surgical patients who met the inclusion criteria were contacted at the general surgical wards at KATH. The study participants were 138 who were selected using the convenience sampling technique.

## QUESTIONNAIRE

A structured questionnaire created and named International Pain Outcome Questionnaire (IPO-Q) by Pain Out [23] was employed for the collection of data. The IPO-Q is a validated questionnaire that is built on the American Pain Society questionnaire [24]. It uses 11-point (0–10) NRS elements and binary elements. Two items centering on the duration pain was severe and pain treatment received utilizing percentage scales [24,25]. The questionnaire also comprises a question concerning pain relief experienced by patients and another on patients wanting more pain treatment.

The questionnaire had a section on the use of NPMs which comprised the use of non-medicine treatment to relieve pain and also whether the use of NPMs helped reduce the pain. Also, how often clinicians encourage the use of NPMs as well as the type of NPM used. Studies that employed IPO-Q have shown an acceptable Cronbach's alpha of 0.85–0.88 88 (26,24,25]

In addition to patient-reported pain outcomes, socio-demographic data (gender, age, marital status, religion, educational level), as well as the type of surgery, duration of surgery, type of anesthesia, type of analgesics given, was obtained through the structured questionnaire.

## DATA ANALYSIS



Inferential statistics, as well as descriptive analysis, were used in the analysis of data which was done using SPSS version 25. In analyzing categorical variables, frequencies and percentages were used.

Pearson's correlation was employed to determine the correlation strength between the variables. The relationships between demographic variables and NPM used were analyzed by Pearson's correlation and Spearman Correlation. All tests were conducted at a level of significance of  $P < 0.05$ .

## Results

### **1. How frequent are the types of NPM used?**

Regarding the use of NPMs of pain relief, 72 (52.2%) of the sample population of patients responded to use some form of non-medicinal methods for pain relief whereas 66 (47.8%) resorted only to the use of pharmacological or medicinal methods (Fig 1)

Insert Figure 1

From Table 1, the most widely used NPM of pain relief was walking 57 (79.2%), followed by relaxation 5 (6.8%), distraction 4 (5.6%), listening to music 3 (4.2%), deep breathing 2 (2.8%),

and meditation 1 (1.4%). The male participants were observed to use more NPMs of pain relief as compared to the females. There was no significant association of use of NPMs between females and males (p-value > 0.05) (Table 1)

**Table 1: Types of NPMs used for pain relief by gender distribution**

| Non-pharmacological method | Male (n) | Female (n) | Total (n) |
|----------------------------|----------|------------|-----------|
| Walking                    | 28       | 29         | 57        |
| Deep breathing             | 2        | 0          | 2         |
| Listening to music         | 2        | 1          | 3         |
| Distraction                | 2        | 2          | 4         |
| Relaxation                 | 2        | 3          | 5         |
| Meditation                 | 1        | 0          | 1         |
| Non-use of NPM             | 44       | 22         | 66        |
| Total                      | 81       | 57         | 138       |

p-value (Cramer's V) = 0.328, Pearson chi-square = 0.328

Moreover, majority of the participants 71 (51.4%) were encouraged by Nurses to use NPMs for their pain relief (Table 2)

**Table 2: How often did a Nurse encourage you to use NPMs?**

| Variable  | Frequency (n) | Percent (%) |
|-----------|---------------|-------------|
| Never     | 71            | 51.4        |
| Sometimes | 67            | 48.6        |
| Total     | 138           | 100.0       |

**2. Does socio-demographics influence the satisfaction of the use of NPMs in the management of POP?**

Meanwhile, a substantial majority of the patients (51.4%) who used NPMs for their pain reliefs reported to have their pain not relieved whereas only 20 (14.5%) had their pain reduced with the use of NPMs (Table 3).

**Table 3: Were the NPMs helpful in reducing pain?**

| Variable | Frequency (n) | Percent (%) |
|----------|---------------|-------------|
| Yes      | 20            | 14.5        |
| No       | 71            | 51.4        |
| Total    | 91            | 65.9        |

Among the socio-demographic characteristics of the participants, only the type of surgery the patients underwent had a statistically significant negative correlation with the use of NPMs of pain relief (Table 4).

**Table 4: Socio-Demographic influence on the satisfaction of the use of NPMs in the management of POP**

| Variable                            | Spearman Correlation Coefficient | p-value |
|-------------------------------------|----------------------------------|---------|
| Gender                              | 0.077                            | 0.468   |
| Age                                 | 0.125                            | 0.239   |
| Level of Education                  | -0.02                            | 0.838   |
| Religion                            | 0.011                            | 0.914   |
| Type of Surgery                     | -0.233*                          | 0.026   |
| Type of anesthesia                  | -0.199                           | 0.058   |
| Duration of Surgery                 | 0.022                            | 0.838   |
| Prescribed post-operative Analgesia | 0.065                            | 0.539   |

\*. Correlation is significant at the 0.05 level (2-tailed).

### 3. Is NPM use related to patients' desire for more pain treatment?

A substantial majority 125 (90.6%) of the participants in this present study desired for more pain treatment whereas only 13 (9.4%) did not wish for more pain treatment (Table 5).

**Table 5: Would you have liked more pain treatment than you received?**

| Variable | Frequency (n) | Percent (%) |
|----------|---------------|-------------|
| Yes      | 125           | 90.6        |
| No       | 13            | 9.4         |
| Total    | 138           | 100.0       |

No statistically significant association was identified between the use of NPMs of pain relief and patient desire for more pain treatment (p-value > 0.05) (Table 6)

**Table 6: Correlation between the use of NPMs and the wish for more pain treatment**

| Variable                                                          | Spearman Correlation Coefficient | p-value |
|-------------------------------------------------------------------|----------------------------------|---------|
| Did you use any non-pharmacological methods to relieve your pain? | 0.138                            | 0.106   |

**4. Does the use of NPM influence patient satisfaction?**

Majority of the participants were highly satisfied 98 (71%) with the overall pain treatment received, with 31 (22.5%) who were highly satisfied. Meanwhile, majority of the patients who were highly satisfied were seen to have used some form of NPMs of pain relief. There was no significant association for satisfaction with pain treatment between the use and non-use of NPMs of pain relief (p-value > 0.05) (Table 7).

**Table 7: Relationship between the use of NPM and the level of satisfaction of patients with pain treatment**

| Level of satisfaction with pain treatment | Did you use any non-pharmacological methods to relieve your pain |        | Total (n) |
|-------------------------------------------|------------------------------------------------------------------|--------|-----------|
|                                           | Yes (n)                                                          | No (n) |           |
| Moderately satisfied                      | 4                                                                | 5      | 9         |
| Highly satisfied                          | 55                                                               | 43     | 98        |
| Very highly satisfied                     | 13                                                               | 18     | 31        |
| Total                                     | 72                                                               | 66     | 138       |

p-value (Cramer's V) = 0.345

A spearman correlation between the use of NPMs of pain relief and over-all satisfaction with pain treatment obtained indicates a significant negative correlation between the type of non-pharmacological treatment and satisfaction with pain treatment (Spearman coefficient = -0.231,

p-value = 0.027). Meanwhile, the use of NPMs of pain relief did not have a significant association with over-satisfaction with pain treatment received (p-value > 0.05) (Table 8).

**Table 8: Satisfaction of patients with pain treatment based on the use of NPMs of pain relief**

| Variable                                                                     | Spearman Correlation Coefficient | p-value |
|------------------------------------------------------------------------------|----------------------------------|---------|
| Did you use any non-pharmacological methods to relieve your pain?            | 0.077                            | 0.370   |
| If yes were these non-pharmacological methods helpful in reducing your pain? | -0.231                           | 0.027   |

\*. Correlation is significant at the 0.05 level (2-tailed).

## Discussion

The use of NPMs for POP management is intended to minimize the use of analgesics and augment the relief of POP as well as improve the quality of life of patients. In our sub-region, few studies have assessed the use of NPM of POP in caring for patients postoperatively hence the aim of this study.

259 During the first hours following surgery pain is at its highest level. The initial and most effective  
260 method for pain control is to deliver analgesics in the early postoperative period. Again, during  
261 the first 48 hours postoperative period, patients suffer unavoidable severe to moderate pain so  
262 generally combination therapy of opioids and NSAIDs are administered as their postoperative  
263 analgesia. [27,25] NPM is often used in POP management after the first 24 hours of surgery [27]

264 This study revealed that 52.2% of the population representing over half of the population  
265 reported the use of NPMs for POP management which could be because health care  
266 professionals knew the use of NPMs and so encouraged patients to use them often. This finding  
267 is consistent with a study by Koumann et al. where half of their respondents reported the use of  
268 NPMs for pain relief [28]

269 Walking was the most widely used NPM of pain relief accounting for 72.9% of the population in  
270 this study. This current study agrees with a study by Ali & Fattah 2020 where they reported  
271 walking and deep breathing exercise as the main form of NPMs for managing postoperative pain  
272 [29] Even though there have been certain developments in the nurse-to-patient ratio and also  
273 doctor-to-patient ratio in Ghana, health care professionals are nonetheless under stress to give out  
274 their best health-care services with a particular time frame as they are flooded with a huge  
275 number of patients to attend to [30] so the type of NPMs where patients can perform on their  
276 own will be recommended for them. This may be why walking was mostly used over the  
277 remaining NPMs in this study. Again, walking may be the preferred NPMs used since most low-  
278 and middle-income countries of which Ghana is part, lack modern-day equipment in the  
279 management of postoperative pain [31].



280 The male participants were observed to use more NPMs of pain relief as compared to the females  
281 in our study which disagrees with other studies where women used more NPMs but with a  
282 comparatively insignificant difference. [28].

283 The majority of the participants representing 51.4% were encouraged by nurses to use NPMs for  
284 their pain relief (Table 2) which disagrees with other studies where Yaban 2019, as well as  
285 Kidanemariam and colleagues, 2020, reported nurses, have either utilized little or no NPMs in  
286 the management of pain [32,33].

287 The difference in the findings of this current study could be due to adequate training by nurses  
288 and other healthcare professionals on the effects of using NPMs for pain relief as has been  
289 reported by other studies. [6,34].

290 Meanwhile, a substantial majority of the patients (51.4%) who used NPMs for their pain relief  
291 reported having their pain not relieved which is consistent with reports by previous studies [28].

292 Whereas a study by Gumus et al., 2020 disagrees with the findings of this current study. [34].

293 The difference may be because pharmacologic pain treatment was started effectively  
294 postoperatively before NPMs were initiated after the first 24 hours or after patients gained pain  
295 control.

296 Moreover, in a systematic review by Ay 2018, it was reported that sociodemographic  
297 characteristics which include sex, age, weight, height, duration of anesthesia, duration of surgery,  
298 experience, and smoking influence pain severity but are different amongst children and adults. In  
299 our current findings, the type of surgery the patients underwent had a statistically significant  
300 negative correlation with the use of NPMs for pain relief (Table 4) which is similar to a study by

301 Koumann and friends where they reported that the effectiveness of NPMs is associated to some  
302 type of surgeries [27,28].

303 The literature revealed that health care practitioners' attitude toward the different types of non-  
304 pharmacological pain management makes the efficacious use of these measures questionable  
305 [16,6]. In that regard, a higher percentage (90.6%) reported the wish for more pain treatment  
306 which is similar to other studies done elsewhere [28].

307 There was no statistically significant relation to the use of NPMs of pain relief and patients'  
308 desire for more pain treatment (Table 6).

309 This similarity may be due to more workload on nurses and other healthcare professionals which  
310 gives them less time to practice NPMs with the patients and so more attention is given to  
311 administering pharmacological treatments.

312 However, the majority of the participants (71%) were highly satisfied with the overall pain  
313 treatment received. Meanwhile, most patients who were highly satisfied were seen to have used  
314 some form of NPMs of pain relief. This finding is in contrast to a study done in Nigeria [35].

315 There was a significant negative correlation between the type of non-pharmacological treatment  
316 received and satisfaction with pain treatment (Spearman coefficient = -0.231, p-value = 0.027).

317 However, the use of NPMs for pain relief did not have a significant association with over-  
318 satisfaction with pain treatment received (p-value > 0.05) (Table 8)

319 Patients are generally satisfied with POP management but the use of NPMs should be  
320 complimented with pharmacologic treatments to affect overall satisfaction with POP.

321

## 322 Conclusion

323 NPMs have been proven to be efficient, inexpensive, and have little or no side effects on  
324 patients. It will be appropriate if patients were allowed to have choices as to which NPMs should  
325 be used. There should be a need for nurses and other healthcare professionals to educate and  
326 offer NPMs to their patients. There should be continuous education on NPMs of postoperative  
327 pain to nurses and other healthcare professionals to help promote the efficiency of intervening in  
328 postoperative pain with the NPMs.

## 329 Limitations

330 This study was limited to patients who had had abdominal surgeries hence there have to be  
331 caution when relating to other cohorts with other types of surgeries. The study was also done in  
332 one tertiary hospital and so caution should be taken when generalizing the findings to a different  
333 context.

## 334 Acknowledgments

335 We would like to express our profound gratitude to all post-operative patients who participated  
336 in the study.

337

**Conflicts of Interest:** The authors declare that they have no competing interests with the research and publication of this study.

**Funding Sources:** The authors received no specific funding for this work.

**Clinical Trial Registry Name and  
Registration Number**

Not applicable

## **REFERENCES**

1. Jabir AR, Ofori-Amanfo G. Patient and practitioner perspectives on postoperative pain control in Kumasi, Ghana. *Southern African Journal of Anaesthesia and Analgesia*. 2013 Jan 1;19(2):102-7.
2. Kolade OA, Abubakar S, Adejumo SR, Funmilayo HV, Tijani A. Knowledge, attitude and practice of surgical site infection prevention among post-operative nurses in a tertiary health institution in north-central Nigeria. *International Journal of Nursing and Midwifery*. 2017 Jun 30;9(6):65-9.

3. Coşofreţ M, Boşnac N, Rucni A, Enache F, Tica C. Reality Of Assessment Pain In Pediatric Surgery. *Revista Societăţii Române De Chirurgie Pediatrică*. 2012 Jan 1;11.
4. Mwashambwa MY, Yongolo IM, Kapalata SN, Meremo AJ. Post-operative pain prevalence, predictors, management practices and satisfaction among operated cases at a Regional Referral Hospital in Dar es Salaam, Tanzania. *Tanzania Journal of Health Research*. 2018 Apr 12;20(2).
5. Masigati HG, Chilonga KS. Postoperative pain management outcomes among adults treated at a tertiary hospital in Moshi, Tanzania. *Tanzania journal of health research*. 2014 Feb 18;16(1).
6. Mwanza E, Gwisai RD, Munemo C. Knowledge on nonpharmacological methods of pain management among nurses at Bindura Hospital, Zimbabwe. *Pain research and treatment*. 2019;2019.
7. Aziato L, Dedey F, Marfo K, Asamani JA, Clegg-Lamptey JN. Validation of three pain scales among adult postoperative patients in Ghana. *BMC nursing*. 2015 Dec;14(1):1-9.
8. Khansa I, Koogler A, Richards J, Bryant R, Janis JE. Pain management in abdominal wall reconstruction. *Plastic and reconstructive surgery Global open*. 2017 Jun;5(6).
9. Sommer M, De Rijke JM, Van Kleef M, Kessels AG, Peters ML, Geurts JW, Gramke HF, Marcus MA. The prevalence of postoperative pain in a sample of 1490 surgical inpatients. *European journal of anaesthesiology*. 2008 Apr;25(4):267-74.
10. Gerbershagen HJ, Rothaug J, Kalkman CJ, Meissner W. Determination of moderate-to-severe postoperative pain on the numeric rating scale: a cut-off point analysis applying four different methods. *British journal of anaesthesia*. 2011 Oct 1;107(4):619-26.
11. van Boekel RL, Vissers KC, van der Sande R, Bronkhorst E, Lerou JG, Steegers MA.

Moving beyond pain scores: Multidimensional pain assessment is essential for adequate pain management after surgery. PLoS One. 2017 May 10;12(5):e0177345.

12. Fatma A, Serife K. Experience of pain in patients undergoing abdominal surgery and nursing approaches to pain control. International Journal of Caring Sciences. 2017 Sep 1;10(3):1456.

13. Bayuo J, Munn Z, Campbell J. Assessment and management of burn pain at the Komfo Anokye Teaching Hospital: a best practice implementation project. JBI Evidence Synthesis. 2017 Sep 1;15(9):2398-418.

14. Gelinas C, Arbour C, Michaud C, Robar L, Côté J. Patients and ICU nurses' perspectives of non-pharmacological interventions for pain management. Nursing in critical care. 2013 Nov;18(6):307-18.

15. Boldt I, Eriks-Hoogland I, Brinkhof MW, de Bie R, Joggi D, von Elm E. Non-pharmacological interventions for chronic pain in people with spinal cord injury. Cochrane Database of Systematic Reviews. 2014(11).

16. International Association for the study of pain (IASP), "Curriculum outline on pain for physical therapy," (2010), <http://www.iasppain.org/content/NavigationMenu/GeneralResourcesLinks/curriculum>; Mwanza E, Gwisai RD, Munemo C. Knowledge on nonpharmacological methods of pain management among nurses at Bindura Hospital, Zimbabwe. Pain research and treatment. 2019;2019.

17. He HG, Jahja R, Lee TL, Ang EN, Sinnappan R, Vehviläinen-Julkunen K, Chan MF. Nurses' use of non-pharmacological methods in children's postoperative pain management: educational intervention study. Journal of Advanced Nursing. 2010 Nov;66(11):2398-409.

18. Adams ML, Arminio GJ. Non-pharmacologic pain management intervention. Clinics in Podiatric medicine and surgery. 2008 Jul 1;25(3):409-29.
19. Goštautaitė S, Piščalkienė V, Laanterä S, Uosukainen L. Non-pharmacological pain management in postoperative care of school-age children. Higher education. 2017;16:4.
20. Seldon LA. Non-pharmacological Methods in Relieving Children's Pain in Hospital: a pilot study.2017.
21. Bausewein C, Booth S, Gysels M, Higginson IJ. Non-pharmacological interventions for breathlessness in advanced stages of malignant and non-malignant diseases. Cochrane Database of Systematic Reviews. 2008(2).
22. Málek J, Ševčík P, Bejšovec D, Gabrhelík T, Hnilicová M, Křikava I, Mixa V. Postoperative pain management. Prague, Czech Republic: Mladá fronta. 2017:102-1.
23. Rothaug J, Zaslansky R, Schwenkglenks M, Komann M, Allvin R, Backström R, Brill S, Buchholz I, Engel C, Fletcher D, Fodor L. Patients' perception of postoperative pain management: validation of the International Pain Outcomes (IPO) questionnaire. The Journal of Pain. 2013 Nov 1;14(11):1361-70.
24. Schwenkglenks M, Gerbershagen HJ, Taylor RS, Pogatzki-Zahn E, Komann M, Rothaug J, Volk T, Yahiaoui-Doktor M, Zaslansky R, Brill S, Ullrich K. Correlates of satisfaction with pain treatment in the acute postoperative period: results from the international PAIN OUT registry. PAIN®. 2014 Jul 1;155(7):1401-11.
25. Tano PF, Apiribu F, Tano EK, Boamah Mensah AB, Dzomeku VM, Boateng I. Predicting factors that determine patients' satisfaction with post-operative pain management following abdominal surgeries at Komfo Anokye Teaching Hospital, Kumasi, Ghana. PloS one. 2021 May 25;16(5):e0251979.

26. Gordon DB, de Leon-Casasola OA, Wu CL, Sluka KA, Brennan TJ, Chou R. Research gaps in practice guidelines for acute postoperative pain management in adults: findings from a review of the evidence for an American Pain Society Clinical Practice Guideline. *The Journal of Pain*. 2016 Feb 1;17(2):158-66.
27. Ay F. Treatment of postoperative pain and non-pharmacologic practices in nursing review: Results of Turkish doctoral dissertation in 2000–2015. *Agri*. 2018 Apr 1;30(2):71-83.
28. Komann M, Weinmann C, Schwenkglenks M, Meissner W. Non-pharmacological methods and post-operative pain relief: An observational study. *Anesthesiology and pain medicine*. 2019 Apr;9(2).
29. Ali SE, Fattah FR. Evaluation of Patient Satisfaction toward Nursing Management of Postoperative Pain: A Comparative Study. *International Journal of Novel Research in Healthcare and Nursing*. 2020 (7)1:763-777.
30. Kokoroko E, Sanda MA. Effect of workload on job stress of Ghanaian OPD nurses: The role of coworker support. *Safety and health at work*. 2019 Sep 1;10(3):341-6.
31. Aziato L, Adejumo O. Developing a context appropriate clinical guideline for post-operative pain management in Ghana: A participatory approach. *International Journal of Africa Nursing Sciences*. 2015 Jan 1;2:26-33.
32. Yaban ZS. Usage of non-pharmacologic methods on postoperative pain management by nurses: Sample of turkey. *International Journal of Caring Sciences*. 2019 Jan;12(1):529-41.
33. Kidanemariam BY, Elsholz T, Simel LL, Tesfamariam EH, Andemeskel YM. Utilization of non-pharmacological methods and the perceived barriers for adult postoperative pain



management by the nurses at selected National Hospitals in Asmara, Eritrea. BMC  
nursing. 2020 Dec;19(1):1-0.

34. Gumus K, Musuroglu S, Ozlu ZK, Tasci O. Determining the use of nonpharmacologic  
methods by surgical nurses for postoperative pain management and the influencing  
professional factors: A multicenter study. Journal of PeriAnesthesia Nursing. 2020 Feb  
1;35(1):75-9.

35. Ibitoye BM, Oyewale TM, Olubiyi KS, Jibril UN, Anyebe EE, Ampofo AG, Gambari  
YA, Olorukooba HO. Incidence of Post-Operative Pain and Patient Satisfaction with its  
Management in University of Ilorin Teaching Hospital. Tropical Journal of Health  
Sciences. 2020 Jul 20;27(2).

### Use of Non-pharmacological methods for pain relief

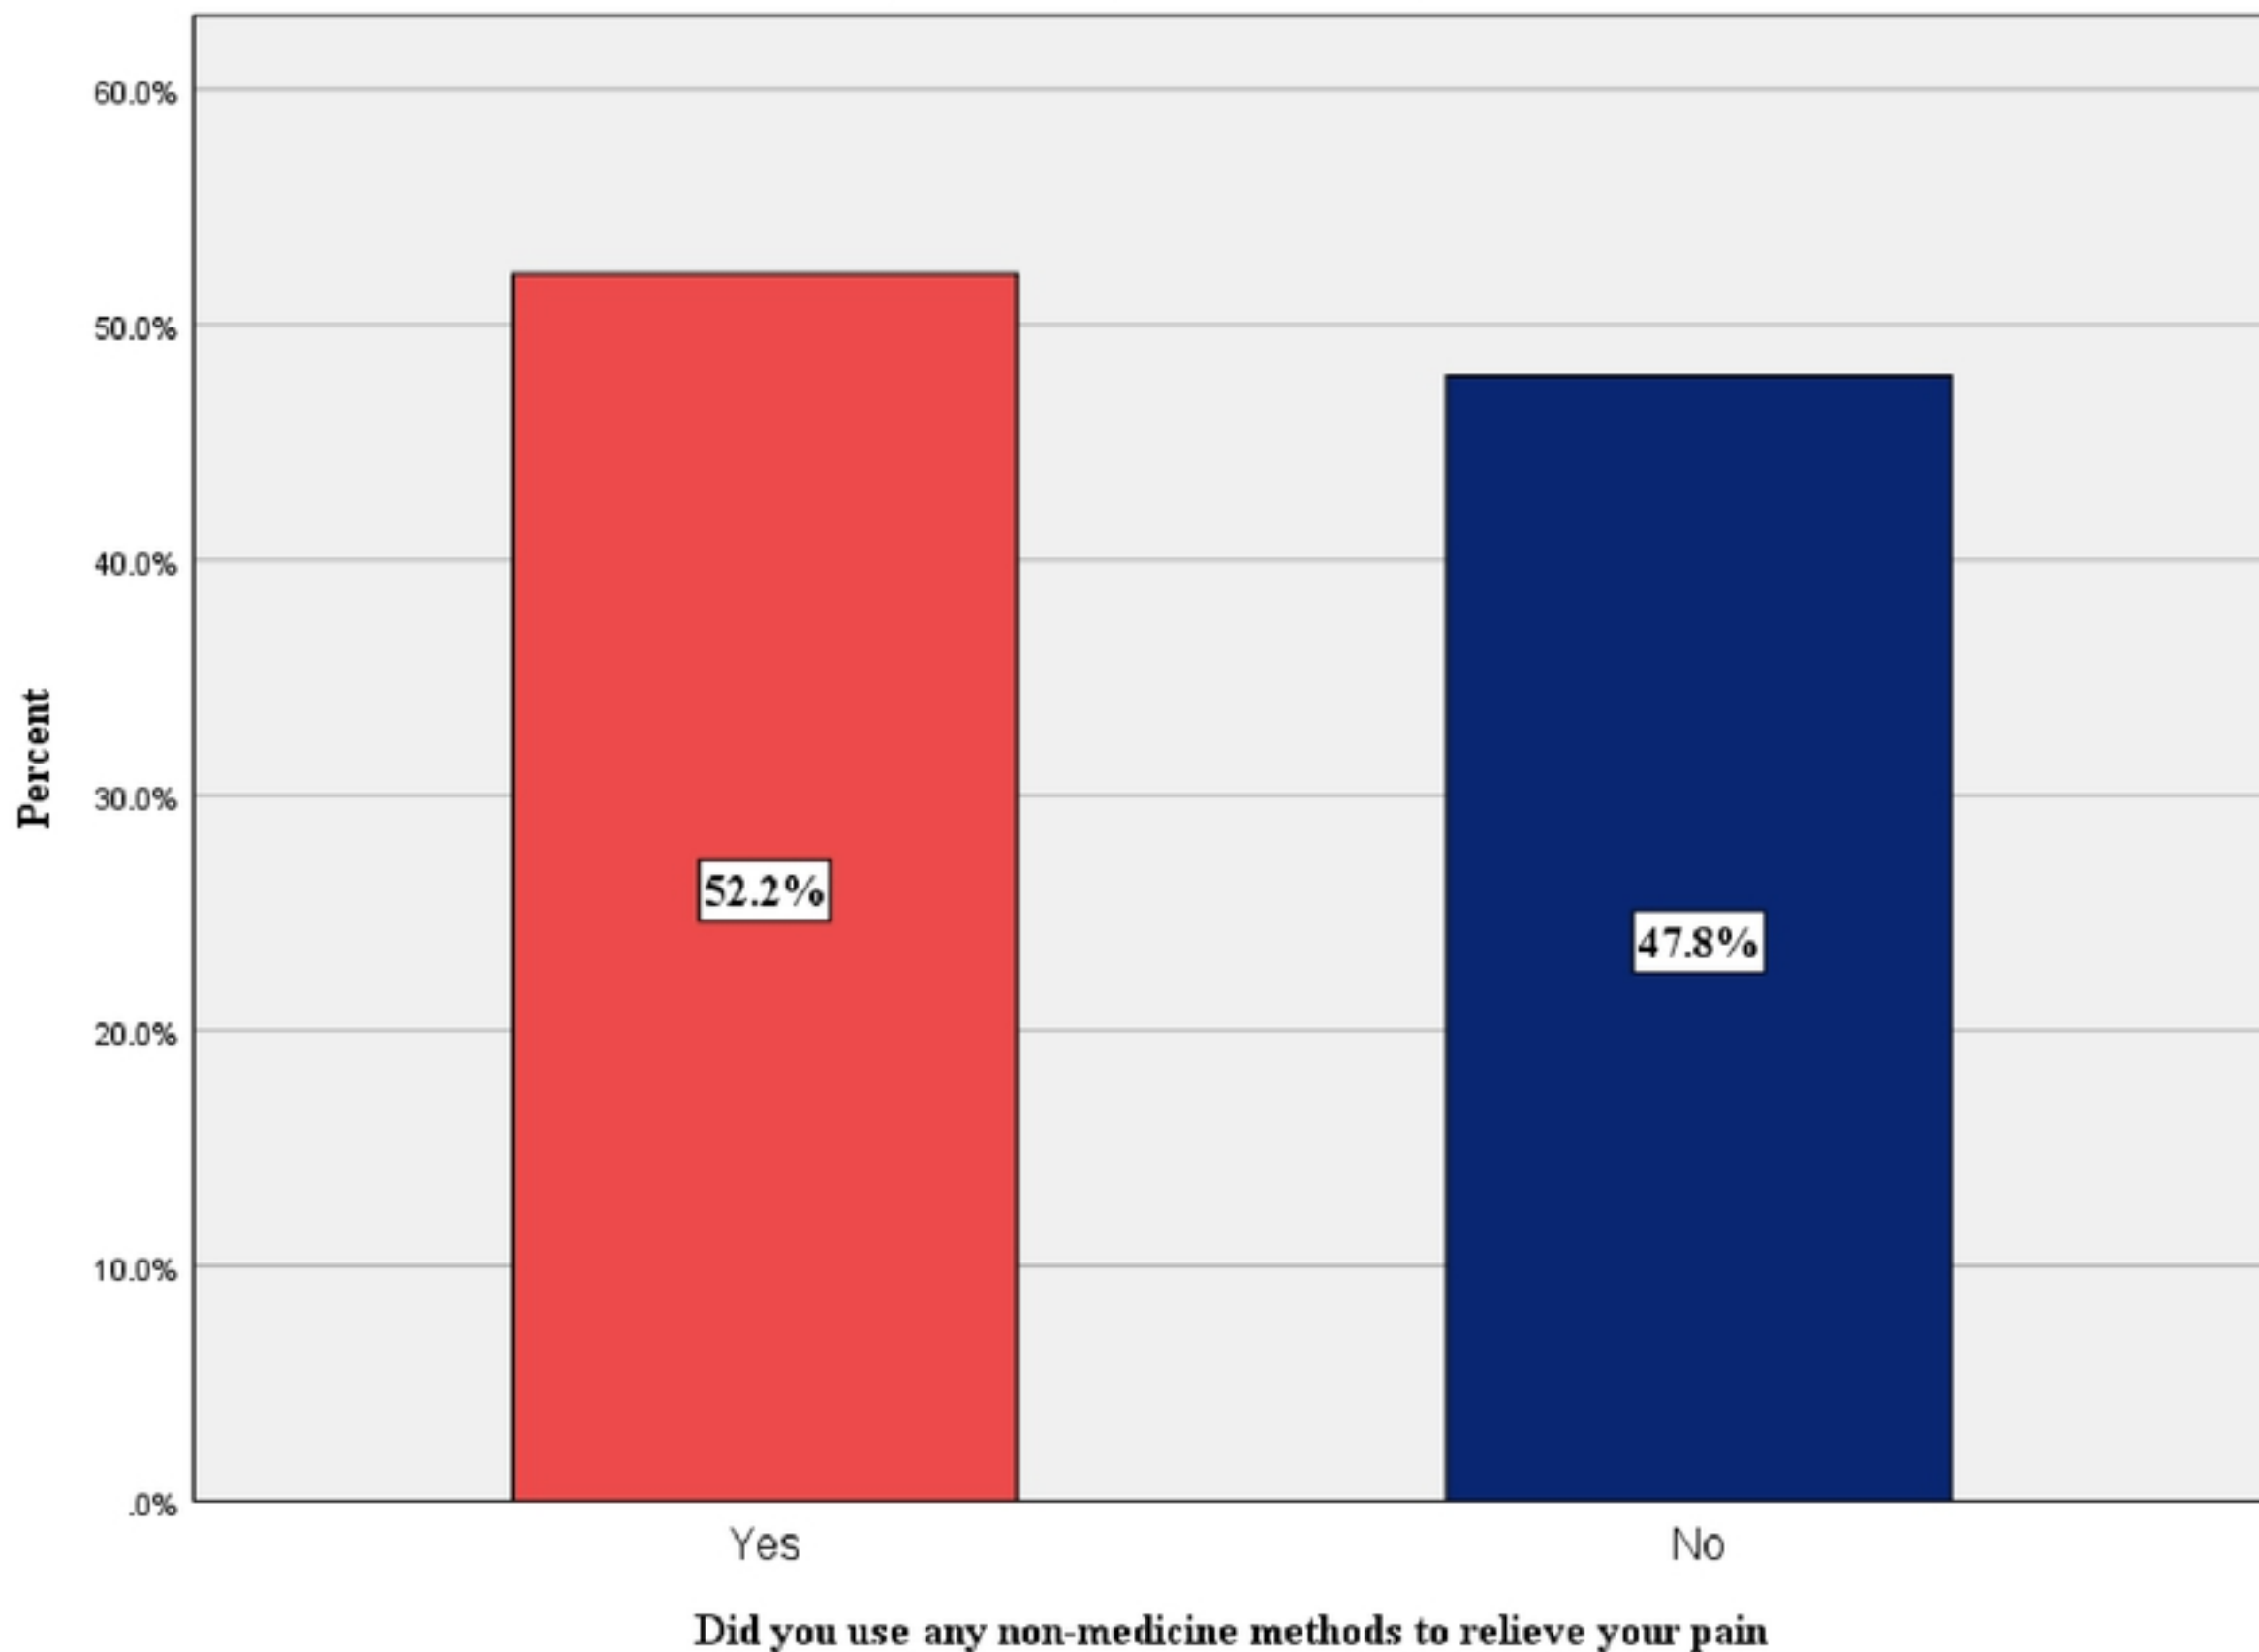

**Figure 1: Did you use any non-pharmacological methods to relieve your pain**

Figure
