1           **TITLE & AUTHORS' PAGE**

2

3   **Full title**

4

5   **Patient satisfaction in the use of non-pharmacological therapies in the management of**  
6   **postoperative pain: a study in a tertiary hospital, Ghana**

7

8   **Short title**

9   **Patient satisfaction and non-pharmacological therapies in postoperative pain management**

10

11   **Authors:**

12   Priscilla Felicia Tano<sup>1\*</sup> (Email: [pftano@gmail.com](mailto:pftano@gmail.com))

13   Felix Apiribu<sup>2</sup> (Email: [fapiribu@yahoo.com](mailto:fapiribu@yahoo.com))

14   Emile Kouakou Tano<sup>1</sup> (Email: [kanot2001@yahoo.com](mailto:kanot2001@yahoo.com))

15   Ramatu Agambire<sup>3</sup>(Email: [ragambire@yahoo.com](mailto:ragambire@yahoo.com) )

16   Isaac Boateng<sup>4</sup> (Email: [iboat256@gmail.com](mailto:iboat256@gmail.com))

17   Victoria Sefah<sup>1</sup> (Email: [victoriasefah2g4@gmail.com](mailto:victoriasefah2g4@gmail.com) )

18

19   <sup>1</sup> Department of Surgery, Komfo Anokye Teaching Hospital, Kumasi, Ghana.

20   <sup>2</sup>Department of Nursing, Faculty of Allied Health Science, College of Health Science, Kwame  
21   Nkrumah University of Science and Technology, Kumasi, Ghana.

22   <sup>3</sup>Department of Nursing, Garden City University College, Kumasi, Ghana

23   <sup>4</sup>Department of Physiology, University of Cape Coast.

24

25 **Correspondence:**

26 Priscilla Felicia Tano

27 [pftano@gmail.com](mailto:pftano@gmail.com)

28

29

30

31

32

33

34

35

36

37

38

39

40

41

42

43 **ABSTRACT**

44 **Background:** Non-pharmacological therapies are the non-medicinal methods used in  
45 postoperative pain (POP) management by health care practitioners such as massage, positioning,  
46 breathing exercise, music therapy, and distraction. It has been discovered that therapies that are  
47 non-pharmacological for the relief of pain are effective with minimal side effects. Studies have  
48 also revealed that non-pharmacological interventions in the management of pain lessen or alter  
49 pain perception by decreasing intensity and intensifying the tolerance of pain. This study,  
50 therefore, seeks to determine how frequently non-pharmacological methods (NPMs) are used in  
51 the management of POP and the influence of these NPMs on patient satisfaction

52 **Methods:** This study was a descriptive cross-sectional design. A quantitative approach was  
53 utilized with a structured questionnaire to obtain responses from patients from October to  
54 December 2019. The study was conducted in the female and male surgical wards of Komfo  
55 Anokye Teaching Hospital (KATH) in Kumasi, Ghana. 138 patients within the first 72 hours  
56 post-operative period who consented and fulfilled the inclusion criteria were enrolled in the  
57 study. A convenience sampling method was used to collect the data. Inferential and descriptive  
58 statistics were used in analyzing the data.

59 **Results:** The majority of the patients, 52.2% responded to using some form of (NPMs) for pain  
60 relief. The most widely used non-pharmacological method of pain relief was walking  
61 representing 79.2%, followed by relaxation 5 (6.8%), distraction 4 (5.6%), listening to music 3  
62 (4.2%), deep breathing 2 (2.8%), and meditation 1 (1.4%). The male participants were observed  
63 to use more NPMs of pain relief as compared to the females. Most of the patients (51.4%) who  
64 used NPMs for their pain relief reported having their pain not relieved. A majority (90.6%) of the

65 participants desired for more pain treatment. The type of surgery the patients underwent had a  
66 statistically significant negative correlation with the use of NPMs of pain relief (Spearman  
67 Correlation Coefficient = -0.233, p-value <0.05). A higher percentage (71%) of participants were  
68 highly satisfied with the overall pain treatment received.

69 **Conclusion:** Non-pharmacological management of POP have been proven to be efficient,  
70 inexpensive, and have little or no side effect on patients. There should be continuous education  
71 on non-pharmacological management of POP to nurses and other healthcare professionals to help  
72 promote the efficiency of intervening in postoperative pain with these methods.

73 **Key Words: Non-pharmacological, pain management, therapies, postoperative pain,**  
74 **patient satisfaction,**

75

76

77

78

79

80

81

82

83

## 84 Introduction

85 Pain treatment is considered a human right as treating pain seeks to gain velocity in WHO policy  
86 with this awareness [1]. Surgeries have played a pivotal role in managing and treating complex  
87 health challenges in patients requiring the process [2]. However, patients who go through  
88 surgical procedures, either minor or major, experience acute POP [3].

89 Globally the prevalence of POP differs among studies. For instance, the American Pain Society  
90 suggests a prevalence of more than 80% with 75% reporting moderate to severe pain [4]. Studies  
91 in Sub-Saharan Africa reveal that POP has been undertreated and the burden of POP ranges from  
92 40 to 95% [5,6]. In Ghana, patients who suffer inadequate POP is about 70% [7].

93 Uncontrolled POP is characterized by longer hospital stays, prolonged post-operative care, more  
94 readmission rates, and reduced patient satisfaction [8]. After both major and minor surgeries, the  
95 majority of patients have acute POP [9,10]. Study reveals that, POP treatment is not easy to  
96 effectively attain because pain is subjective, so finding the type of surgery can aid in achieving  
97 successful POP management [11].

98 Studies suggest that the treatment of POP is still unsatisfactory [1,5,12] even though  
99 pharmacological methods are in use for the treatment of pain [13].

100 Interventions that are not pharmacological are viewed to be therapies that do not include taking  
101 medications or other substances that are active [14,15]. More precisely, non-pharmacological  
102 therapies are the non-medicinal methods used in postoperative pain management by health care  
103 practitioners such as massage, positioning, breathing exercise, music therapy, and distraction. It

104 has been discovered that therapies that are not pharmacological for the relief of pain are effective  
105 with minimized side effects and complications [6].

106 Studies have shown that health care practitioners' attitude and lack of knowledge on the different  
107 types of non-pharmacological pain management makes the efficacious use of these measures  
108 questionable [6,16]. Previous studies also reveal that non-medicine interventions in the  
109 management of pain lessen or alter pain perception by decreasing intensity and intensifying the  
110 tolerance of pain, decreasing pain-related stress, changing pain behavior, reinforcing coping  
111 skills, and giving patient and relatives the feeling of control over the pain [17,18,19,20]

112 Non-pharmacological therapies can complement pharmacological therapies and present another  
113 treatment in post-operative pain management but such interventions are under-utilized [14,21].

114 Using NPMs aids in the reduction of the intake of opioids and its possibly damaging  
115 physiological and psychological reactions to the pain [19].

116 When NPMs are employed as adjuvant treatment, they decrease the anxiety of the patient and  
117 increase patient satisfaction with POP management. Several studies on surgical procedures  
118 reported that these techniques led to a decreased analgesic use post-operatively, or a reduced  
119 pain intensity on Day 2 or 3 of post-operation [22].

120 NPMs of pain relief can be classified as;

- 121 1. Physical activities such as deep breathing, walking, or light to moderate sportive activities.
- 122 2. Psychological/spiritual interventions like meditation or relaxation, distraction such as listening  
123 to music or talking to people, praying, watching TV, stress management, visualization, hypnosis,  
124 and imagery.

125 3. Inactively used physical methods such as heat / cold packs, massaging, physiotherapy,  
126 transcutaneous electrical nerve stimulation (TENS), chiropractic, acupressure, and acupuncture.  
127 Clarity on the understanding of the use of NPMs in our sub-region and the effect on POP  
128 management as well as the patient satisfaction with the use of these therapies will be mentioned,  
129 as the aim of this study was to understand how frequent the types of NPMs are used, socio-  
130 demographics influence with the satisfaction of the use of NPMs in the management of POP, if  
131 NPMs used, is related to patients' wish for more pain treatment and the influence of NPMs on  
132 patient satisfaction.

133

## 134 Methodology

### 135 STUDY DESIGN AND STUDY SETTING

136 This research is part of a larger study of POP management in a tertiary hospital in Ghana where a  
137 descriptive cross-sectional design was utilized. A quantitative approach was employed utilizing a  
138 structured questionnaire to obtain responses from participants between October 2019 and  
139 December 2019. The study was conducted in the female and male surgical wards of Komfo  
140 Anokye Teaching Hospital (KATH) in Kumasi, Ghana.

141

### 142 STUDY PARTICIPANTS, SAMPLING TECHNIQUE, AND SAMPLE SIZE

143 Post-operative clients within the first 72 hours post-operative period who consented were  
144 allowed to participate in the study. Surgical patients who met the inclusion criteria were  
145 contacted at the general surgical wards at KATH. The study participants were 138 who were  
146 selected using the convenience sampling technique.

## 147 QUESTIONNAIRE

148 A structured questionnaire created and named International Pain Outcome Questionnaire (IPO-  
149 Q) by Pain Out [23] was employed for the collection of data. The IPO-Q is a validated  
150 questionnaire that is built on the American Pain Society questionnaire [24]. It uses 11-point (0–  
151 10) NRS elements and binary elements. Two items centering on the duration pain was severe and  
152 pain treatment received utilizing percentage scales [24,25]. The questionnaire also comprises a  
153 question concerning pain relief experienced by patients and another on patients wanting more  
154 pain treatment.

155 The questionnaire had a section on the use of NPMs which comprised the use of non-medicine  
156 treatment to relieve pain and also whether the use of NPMs helped reduce the pain. Also, how  
157 often clinicians encourage the use of NPMs as well as the type of NPM used. Studies that  
158 employed IPO-Q have shown an acceptable Cronbach's alpha of 0.85–0.88 88 (26,24,25]

159 In addition to patient-reported pain outcomes, socio-demographic data (gender, age, marital  
160 status, religion, educational level), as well as the type of surgery, duration of surgery, type of  
161 anesthesia, type of analgesics given, was obtained through the structured questionnaire.

## 162 DATA ANALYSIS



163 Inferential statistics, as well as descriptive analysis, were used in the analysis of data which was  
164 done using SPSS version 25. In analyzing categorical variables, frequencies and percentages  
165 were used.

166 Pearson's correlation was employed to determine the correlation strength between the variables.  
167 The relationships between demographic variables and NPM used were analyzed by Pearson's  
168 correlation and Spearman Correlation. All tests were conducted at a level of significance of  
169  $P < 0.05$ .

170

## 171 Results

### 172 1. How frequent are the types of NPM used?

173 Regarding the use of NPMs of pain relief, 72 (52.2%) of the sample population of patients  
174 responded to use some form of non-medicinal methods for pain relief whereas 66 (47.8%) resorted  
175 only to the use of pharmacological or medicinal methods (Fig 1)

176

177 Insert Figure 1

178

179

180

181 From Table 1, the most widely used NPM of pain relief was walking 57 (79.2%), followed by  
182 relaxation 5 (6.8%), distraction 4 (5.6%), listening to music 3 (4.2%), deep breathing 2 (2.8%),

183 and meditation 1 (1.4%). The male participants were observed to use more NPMs of pain relief as  
184 compared to the females. There was no significant association of use of NPMs between females  
185 and males (p-value > 0.05) (Table 1)

186 **Table 1: Types of NPMs used for pain relief by gender distribution**

187

| Non-pharmacological method | Male (n) | Female (n) | Total (n) |
|----------------------------|----------|------------|-----------|
| Walking                    | 28       | 29         | 57        |
| Deep breathing             | 2        | 0          | 2         |
| Listening to music         | 2        | 1          | 3         |
| Distraction                | 2        | 2          | 4         |
| Relaxation                 | 2        | 3          | 5         |
| Meditation                 | 1        | 0          | 1         |
| Non-use of NPM             | 44       | 22         | 66        |
| Total                      | 81       | 57         | 138       |

188 p-value (Cramer's V) = 0.328, Pearson chi-square = 0.328

189

190 Moreover, majority of the participants 71 (51.4%) were encouraged by Nurses to use NPMs for  
191 their pain relief (Table 2)

192 **Table 2: How often did a Nurse encourage you to use NPMs?**

| Variable  | Frequency (n) | Percent (%) |
|-----------|---------------|-------------|
| Never     | 71            | 51.4        |
| Sometimes | 67            | 48.6        |
| Total     | 138           | 100.0       |

193

194

195

196 **2. Does socio-demographics influence the satisfaction of the use of NPMs in the management**  
197 **of POP?**

198 Meanwhile, a substantial majority of the patients (51.4%) who used NPMs for their pain reliefs  
199 reported to have their pain not relieved whereas only 20 (14.5%) had their pain reduced with the  
200 use of NPMs (Table 3).

201 **Table 3: Were the NPMs helpful in reducing pain?**

| Variable | Frequency (n) | Percent (%) |
|----------|---------------|-------------|
| Yes      | 20            | 14.5        |
| No       | 71            | 51.4        |
| Total    | 91            | 65.9        |

202

203 Among the socio-demographic characteristics of the participants, only the type of surgery the  
204 patients underwent had a statistically significant negative correlation with the use of NPMs of pain  
205 relief (Table 4).

206 **Table 4: Socio-Demographic influence on the satisfaction of the use of NPMs in the**  
207 **management of POP**

208

| Variable                            | Spearman Correlation Coefficient | p-value |
|-------------------------------------|----------------------------------|---------|
| Gender                              | 0.077                            | 0.468   |
| Age                                 | 0.125                            | 0.239   |
| Level of Education                  | -0.02                            | 0.838   |
| Religion                            | 0.011                            | 0.914   |
| Type of Surgery                     | -0.233*                          | 0.026   |
| Type of anesthesia                  | -0.199                           | 0.058   |
| Duration of Surgery                 | 0.022                            | 0.838   |
| Prescribed post-operative Analgesia | 0.065                            | 0.539   |

209 \*. Correlation is significant at the 0.05 level (2-tailed).

210

211

### 212 3. Is NPM use related to patients' desire for more pain treatment?

213 A substantial majority 125 (90.6%) of the participants in this present study desired for more pain  
214 treatment whereas only 13 (9.4%) did not wish for more pain treatment (Table 5).

215

216 **Table 5: Would you have liked more pain treatment than you received?**

| Variable | Frequency (n) | Percent (%) |
|----------|---------------|-------------|
| Yes      | 125           | 90.6        |
| No       | 13            | 9.4         |
| Total    | 138           | 100.0       |

217

218 No statistically significant association was identified between the use of NPMs of pain relief and  
219 patient desire for more pain treatment (p-value > 0.05) (Table 6)

220

221

222 **Table 6: Correlation between the use of NPMs and the wish for more pain treatment**

| Variable                                                          | Spearman Correlation Coefficient | p-value |
|-------------------------------------------------------------------|----------------------------------|---------|
| Did you use any non-pharmacological methods to relieve your pain? | 0.138                            | 0.106   |

223

224 **4. Does the use of NPM influence patient satisfaction?**

225 Majority of the participants were highly satisfied 98 (71%) with the overall pain treatment  
226 received, with 31 (22.5%) who were highly satisfied. Meanwhile, majority of the patients who  
227 were highly satisfied were seen to have used some form of NPMs of pain relief. There was no  
228 significant association for satisfaction with pain treatment between the use and non-use of NPMs  
229 of pain relief (p-value > 0.05) (Table 7).

230

231

232

233

234  
235  
236  
237  
238  
239

**Table 7: Relationship between the use of NPM and the level of satisfaction of patients with pain treatment**

| Level of satisfaction with pain treatment | Did you use any non-pharmacological methods to relieve your pain |        | Total (n) |
|-------------------------------------------|------------------------------------------------------------------|--------|-----------|
|                                           | Yes (n)                                                          | No (n) |           |
| Moderately satisfied                      | 4                                                                | 5      | 9         |
| Highly satisfied                          | 55                                                               | 43     | 98        |
| Very highly satisfied                     | 13                                                               | 18     | 31        |
| Total                                     | 72                                                               | 66     | 138       |

240  
241  
242  
243  
244  
245

p-value (Cramer's V) = 0.345

A spearman correlation between the use of NPMs of pain relief and over-all satisfaction with pain treatment obtained indicates a significant negative correlation between the type of non-pharmacological treatment and satisfaction with pain treatment (Spearman coefficient = -0.231,

246 p-value = 0.027). Meanwhile, the use of NPMs of pain relief did not have a significant  
247 association with over-satisfaction with pain treatment received (p-value > 0.05) (Table 8).

248

249

250 **Table 8: Satisfaction of patients with pain treatment based on the use of NPMs of pain**  
251 **relief**

| Variable                                                                     | Spearman Correlation Coefficient | p-value |
|------------------------------------------------------------------------------|----------------------------------|---------|
| Did you use any non-pharmacological methods to relieve your pain?            | 0.077                            | 0.370   |
| If yes were these non-pharmacological methods helpful in reducing your pain? | -0.231                           | 0.027   |

252 \*. Correlation is significant at the 0.05 level (2-tailed).

253

## 254 Discussion

255 The use of NPMs for POP management is intended to minimize the use of analgesics and  
256 augment the relief of POP as well as improve the quality of life of patients. In our sub-region,  
257 few studies have assessed the use of NPM of POP in caring for patients postoperatively hence  
258 the aim of this study.

259 During the first hours following surgery pain is at its highest level. The initial and most effective  
260 method for pain control is to deliver analgesics in the early postoperative period. Again, during  
261 the first 48 hours postoperative period, patients suffer unavoidable severe to moderate pain so  
262 generally combination therapy of opioids and NSAIDs are administered as their postoperative  
263 analgesia. [27,25] NPM is often used in POP management after the first 24 hours of surgery [27]

264 This study revealed that 52.2% of the population representing over half of the population  
265 reported the use of NPMs for POP management which could be because health care  
266 professionals knew the use of NPMs and so encouraged patients to use them often. This finding  
267 is consistent with a study by Koumann et al. where half of their respondents reported the use of  
268 NPMs for pain relief [28]

269 Walking was the most widely used NPM of pain relief accounting for 72.9% of the population in  
270 this study. This current study agrees with a study by Ali & Fattah 2020 where they reported  
271 walking and deep breathing exercise as the main form of NPMs for managing postoperative pain  
272 [29] Even though there have been certain developments in the nurse-to-patient ratio and also  
273 doctor-to-patient ratio in Ghana, health care professionals are nonetheless under stress to give out  
274 their best health-care services with a particular time frame as they are flooded with a huge  
275 number of patients to attend to [30] so the type of NPMs where patients can perform on their  
276 own will be recommended for them. This may be why walking was mostly used over the  
277 remaining NPMs in this study. Again, walking may be the preferred NPMs used since most low-  
278 and middle-income countries of which Ghana is part, lack modern-day equipment in the  
279 management of postoperative pain [31].



280 The male participants were observed to use more NPMs of pain relief as compared to the females  
281 in our study which disagrees with other studies where women used more NPMs but with a  
282 comparatively insignificant difference. [28].

283 The majority of the participants representing 51.4% were encouraged by nurses to use NPMs for  
284 their pain relief (Table 2) which disagrees with other studies where Yaban 2019, as well as  
285 Kidanemariam and colleagues, 2020, reported nurses, have either utilized little or no NPMs in  
286 the management of pain [32,33].

287 The difference in the findings of this current study could be due to adequate training by nurses  
288 and other healthcare professionals on the effects of using NPMs for pain relief as has been  
289 reported by other studies. [6,34].

290 Meanwhile, a substantial majority of the patients (51.4%) who used NPMs for their pain relief  
291 reported having their pain not relieved which is consistent with reports by previous studies [28].

292 Whereas a study by Gumus et al., 2020 disagrees with the findings of this current study. [34].

293 The difference may be because pharmacologic pain treatment was started effectively  
294 postoperatively before NPMs were initiated after the first 24 hours or after patients gained pain  
295 control.

296 Moreover, in a systematic review by Ay 2018, it was reported that sociodemographic  
297 characteristics which include sex, age, weight, height, duration of anesthesia, duration of surgery,  
298 experience, and smoking influence pain severity but are different amongst children and adults. In  
299 our current findings, the type of surgery the patients underwent had a statistically significant  
300 negative correlation with the use of NPMs for pain relief (Table 4) which is similar to a study by

301 Koumann and friends where they reported that the effectiveness of NPMs is associated to some  
302 type of surgeries [27,28].

303 The literature revealed that health care practitioners' attitude toward the different types of non-  
304 pharmacological pain management makes the efficacious use of these measures questionable  
305 [16,6]. In that regard, a higher percentage (90.6%) reported the wish for more pain treatment  
306 which is similar to other studies done elsewhere [28].

307 There was no statistically significant relation to the use of NPMs of pain relief and patients'  
308 desire for more pain treatment (Table 6).

309 This similarity may be due to more workload on nurses and other healthcare professionals which  
310 gives them less time to practice NPMs with the patients and so more attention is given to  
311 administering pharmacological treatments.

312 However, the majority of the participants (71%) were highly satisfied with the overall pain  
313 treatment received. Meanwhile, most patients who were highly satisfied were seen to have used  
314 some form of NPMs of pain relief. This finding is in contrast to a study done in Nigeria [35].

315 There was a significant negative correlation between the type of non-pharmacological treatment  
316 received and satisfaction with pain treatment (Spearman coefficient = -0.231, p-value = 0.027).

317 However, the use of NPMs for pain relief did not have a significant association with over-  
318 satisfaction with pain treatment received (p-value > 0.05) (Table 8)

319 Patients are generally satisfied with POP management but the use of NPMs should be  
320 complimented with pharmacologic treatments to affect overall satisfaction with POP.

321

## 322 Conclusion

323 NPMs have been proven to be efficient, inexpensive, and have little or no side effects on  
324 patients. It will be appropriate if patients were allowed to have choices as to which NPMs should  
325 be used. There should be a need for nurses and other healthcare professionals to educate and  
326 offer NPMs to their patients. There should be continuous education on NPMs of postoperative  
327 pain to nurses and other healthcare professionals to help promote the efficiency of intervening in  
328 postoperative pain with the NPMs.

## 329 Limitations

330 This study was limited to patients who had had abdominal surgeries hence there have to be  
331 caution when relating to other cohorts with other types of surgeries. The study was also done in  
332 one tertiary hospital and so caution should be taken when generalizing the findings to a different  
333 context.

## 334 Acknowledgments

335 We would like to express our profound gratitude to all post-operative patients who participated  
336 in the study.

337

338 **Conflicts of Interest:** The authors declare that they have no competing  
339 interests with the research and publication of this study.

340 **Funding Sources:** The authors received no specific funding for this work.

341

342 **Clinical Trial Registry Name and**  
343 **Registration Number**

344 Not applicable

345

346

347 **REFERENCES**

- 348 1. Jabir AR, Ofori-Amanfo G. Patient and practitioner perspectives on postoperative pain  
349 control in Kumasi, Ghana. *Southern African Journal of Anaesthesia and Analgesia*. 2013  
350 Jan 1;19(2):102-7.
- 351 2. Kolade OA, Abubakar S, Adejumoke SR, Funmilayo HV, Tijani A. Knowledge, attitude  
352 and practice of surgical site infection prevention among post-operative nurses in a tertiary  
353 health institution in north-central Nigeria. *International Journal of Nursing and*  
354 *Midwifery*. 2017 Jun 30;9(6):65-9.

- 355 3. Coşofreţ M, Boşnac N, Rucni A, Enache F, Tica C. Reality Of Assessment Pain In  
356 Pediatric Surgery. *Revista Societății Române De Chirurgie Pediatrică*. 2012 Jan 1:11.
- 357 4. Mwashambwa MY, Yongolo IM, Kapalata SN, Meremo AJ. Post-operative pain  
358 prevalence, predictors, management practices and satisfaction among operated cases at a  
359 Regional Referral Hospital in Dar es Salaam, Tanzania. *Tanzania Journal of Health  
360 Research*. 2018 Apr 12;20(2).
- 361 5. Masigati HG, Chilonga KS. Postoperative pain management outcomes among adults  
362 treated at a tertiary hospital in Moshi, Tanzania. *Tanzania journal of health research*.  
363 2014 Feb 18;16(1).
- 364 6. Mwanza E, Gwisai RD, Munemo C. Knowledge on nonpharmacological methods of pain  
365 management among nurses at Bindura Hospital, Zimbabwe. *Pain research and treatment*.  
366 2019;2019.
- 367 7. Aziato L, Dedey F, Marfo K, Asamani JA, Clegg-Lampsey JN. Validation of three pain  
368 scales among adult postoperative patients in Ghana. *BMC nursing*. 2015 Dec;14(1):1-9.
- 369 8. Khansa I, Koogler A, Richards J, Bryant R, Janis JE. Pain management in abdominal  
370 wall reconstruction. *Plastic and reconstructive surgery Global open*. 2017 Jun;5(6).
- 371 9. Sommer M, De Rijke JM, Van Kleef M, Kessels AG, Peters ML, Geurts JW, Gramke  
372 HF, Marcus MA. The prevalence of postoperative pain in a sample of 1490 surgical  
373 inpatients. *European journal of anaesthesiology*. 2008 Apr;25(4):267-74.
- 374 10. Gerbershagen HJ, Rothaug J, Kalkman CJ, Meissner W. Determination of moderate-to-  
375 severe postoperative pain on the numeric rating scale: a cut-off point analysis applying  
376 four different methods. *British journal of anaesthesia*. 2011 Oct 1;107(4):619-26.
- 377 11. van Boekel RL, Vissers KC, van der Sande R, Bronkhorst E, Lerou JG, Steegers MA.

- 378 Moving beyond pain scores: Multidimensional pain assessment is essential for adequate  
379 pain management after surgery. PLoS One. 2017 May 10;12(5):e0177345.
- 380 12. Fatma A, Serife K. Experience of pain in patients undergoing abdominal surgery and  
381 nursing approaches to pain control. International Journal of Caring Sciences. 2017 Sep  
382 1;10(3):1456.
- 383 13. Bayuo J, Munn Z, Campbell J. Assessment and management of burn pain at the Komfo  
384 Anokye Teaching Hospital: a best practice implementation project. JBI Evidence  
385 Synthesis. 2017 Sep 1;15(9):2398-418.
- 386 14. Gelinac C, Arbour C, Michaud C, Robar L, Côté J. Patients and ICU nurses' perspectives  
387 of non-pharmacological interventions for pain management. Nursing in critical care. 2013  
388 Nov;18(6):307-18.
- 389 15. Boldt I, Eriks-Hoogland I, Brinkhof MW, de Bie R, Joggi D, von Elm E.  
390 Non-pharmacological interventions for chronic pain in people with spinal cord injury.  
391 Cochrane Database of Systematic Reviews. 2014(11).
- 392 16. International Association for the study of pain (IASP), "Curriculum outline on pain for  
393 physical therapy," (2010), [http://www.iasppain.org/content/NavigationMenu/General  
394 ResourcesLinks/curriculum](http://www.iasppain.org/content/NavigationMenu/GeneralResourcesLinks/curriculum); Mwanza E, Gwisai RD, Munemo C. Knowledge on  
395 nonpharmacological methods of pain management among nurses at Bindura Hospital,  
396 Zimbabwe. Pain research and treatment. 2019;2019.
- 397 17. He HG, Jahja R, Lee TL, Ang EN, Sinnappan R, Vehviläinen-Julkunen K, Chan MF.  
398 Nurses' use of non-pharmacological methods in children's postoperative pain  
399 management: educational intervention study. Journal of Advanced Nursing. 2010  
400 Nov;66(11):2398-409.

- 401 18. Adams ML, Arminio GJ. Non-pharmacologic pain management intervention. Clinics in  
402 Podiatric medicine and surgery. 2008 Jul 1;25(3):409-29.
- 403 19. Goštautaitė S, Piščalkienė V, Laanterä S, Uosukainen L. Non-pharmacological pain  
404 management in postoperative care of school-age children. Higher education. 2017;16:4.
- 405 20. Seldon LA. Non-pharmacological Methods in Relieving Children's Pain in Hospital: a  
406 pilot study.2017.
- 407 21. Bausewein C, Booth S, Gysels M, Higginson IJ. Non-pharmacological interventions for  
408 breathlessness in advanced stages of malignant and non-malignant diseases. Cochrane  
409 Database of Systematic Reviews. 2008(2).
- 410 22. Málek J, Ševčík P, Bejšovec D, Gabrhelík T, Hnilicová M, Křikava I, Mixa V.  
411 Postoperative pain management. Prague, Czech Republic: Mladá fronta. 2017:102-1.
- 412 23. Rothaug J, Zaslansky R, Schwenkglenks M, Komann M, Allvin R, Backström R, Brill S,  
413 Buchholz I, Engel C, Fletcher D, Fodor L. Patients' perception of postoperative pain  
414 management: validation of the International Pain Outcomes (IPO) questionnaire. The  
415 Journal of Pain. 2013 Nov 1;14(11):1361-70.
- 416 24. Schwenkglenks M, Gerbershagen HJ, Taylor RS, Pogatzki-Zahn E, Komann M, Rothaug  
417 J, Volk T, Yahiaoui-Doktor M, Zaslansky R, Brill S, Ullrich K. Correlates of satisfaction  
418 with pain treatment in the acute postoperative period: results from the international PAIN  
419 OUT registry. PAIN®. 2014 Jul 1;155(7):1401-11.
- 420 25. Tano PF, Apiribu F, Tano EK, Boamah Mensah AB, Dzomeku VM, Boateng I.  
421 Predicting factors that determine patients' satisfaction with post-operative pain  
422 management following abdominal surgeries at Komfo Anokye Teaching Hospital,  
423 Kumasi, Ghana. PloS one. 2021 May 25;16(5):e0251979.

- 424 26. Gordon DB, de Leon-Casasola OA, Wu CL, Sluka KA, Brennan TJ, Chou R. Research  
425 gaps in practice guidelines for acute postoperative pain management in adults: findings  
426 from a review of the evidence for an American Pain Society Clinical Practice Guideline.  
427 *The Journal of Pain*. 2016 Feb 1;17(2):158-66.
- 428 27. Ay F. Treatment of postoperative pain and non-pharmacologic practices in nursing  
429 review: Results of Turkish doctoral dissertation in 2000–2015. *Agri*. 2018 Apr  
430 1;30(2):71-83.
- 431 28. Komann M, Weinmann C, Schwenkglens M, Meissner W. Non-pharmacological  
432 methods and post-operative pain relief: An observational study. *Anesthesiology and pain  
433 medicine*. 2019 Apr;9(2).
- 434 29. Ali SE, Fattah FR. Evaluation of Patient Satisfaction toward Nursing Management of  
435 Postoperative Pain: A Comparative Study. *International Journal of Novel Research in  
436 Healthcare and Nursing*. 2020 (7)1:763-777.
- 437 30. Kokoroko E, Sanda MA. Effect of workload on job stress of Ghanaian OPD nurses: The  
438 role of coworker support. *Safety and health at work*. 2019 Sep 1;10(3):341-6.
- 439 31. Aziato L, Adejumo O. Developing a context appropriate clinical guideline for post-  
440 operative pain management in Ghana: A participatory approach. *International Journal of  
441 Africa Nursing Sciences*. 2015 Jan 1;2:26-33.
- 442 32. Yaban ZS. Usage of non-pharmacologic methods on postoperative pain management by  
443 nurses: Sample of turkey. *International Journal of Caring Sciences*. 2019 Jan;12(1):529-  
444 41.
- 445 33. Kidanemariam BY, Elsholz T, Simel LL, Tesfamariam EH, Andemeskel YM. Utilization  
446 of non-pharmacological methods and the perceived barriers for adult postoperative pain



- 447 management by the nurses at selected National Hospitals in Asmara, Eritrea. BMC  
448 nursing. 2020 Dec;19(1):1-0.
- 449 34. Gumus K, Musuroglu S, Ozlu ZK, Tasci O. Determining the use of nonpharmacologic  
450 methods by surgical nurses for postoperative pain management and the influencing  
451 professional factors: A multicenter study. Journal of PeriAnesthesia Nursing. 2020 Feb  
452 1;35(1):75-9.
- 453 35. Ibitoye BM, Oyewale TM, Olubiyi KS, Jibril UN, Anyebe EE, Ampofu AG, Gambari  
454 YA, Olorukooba HO. Incidence of Post-Operative Pain and Patient Satisfaction with its  
455 Management in University of Ilorin Teaching Hospital. Tropical Journal of Health  
456 Sciences. 2020 Jul 20;27(2).

457

458

459

460

461

462

463

464

# Use of Non-pharmacological methods for pain relief

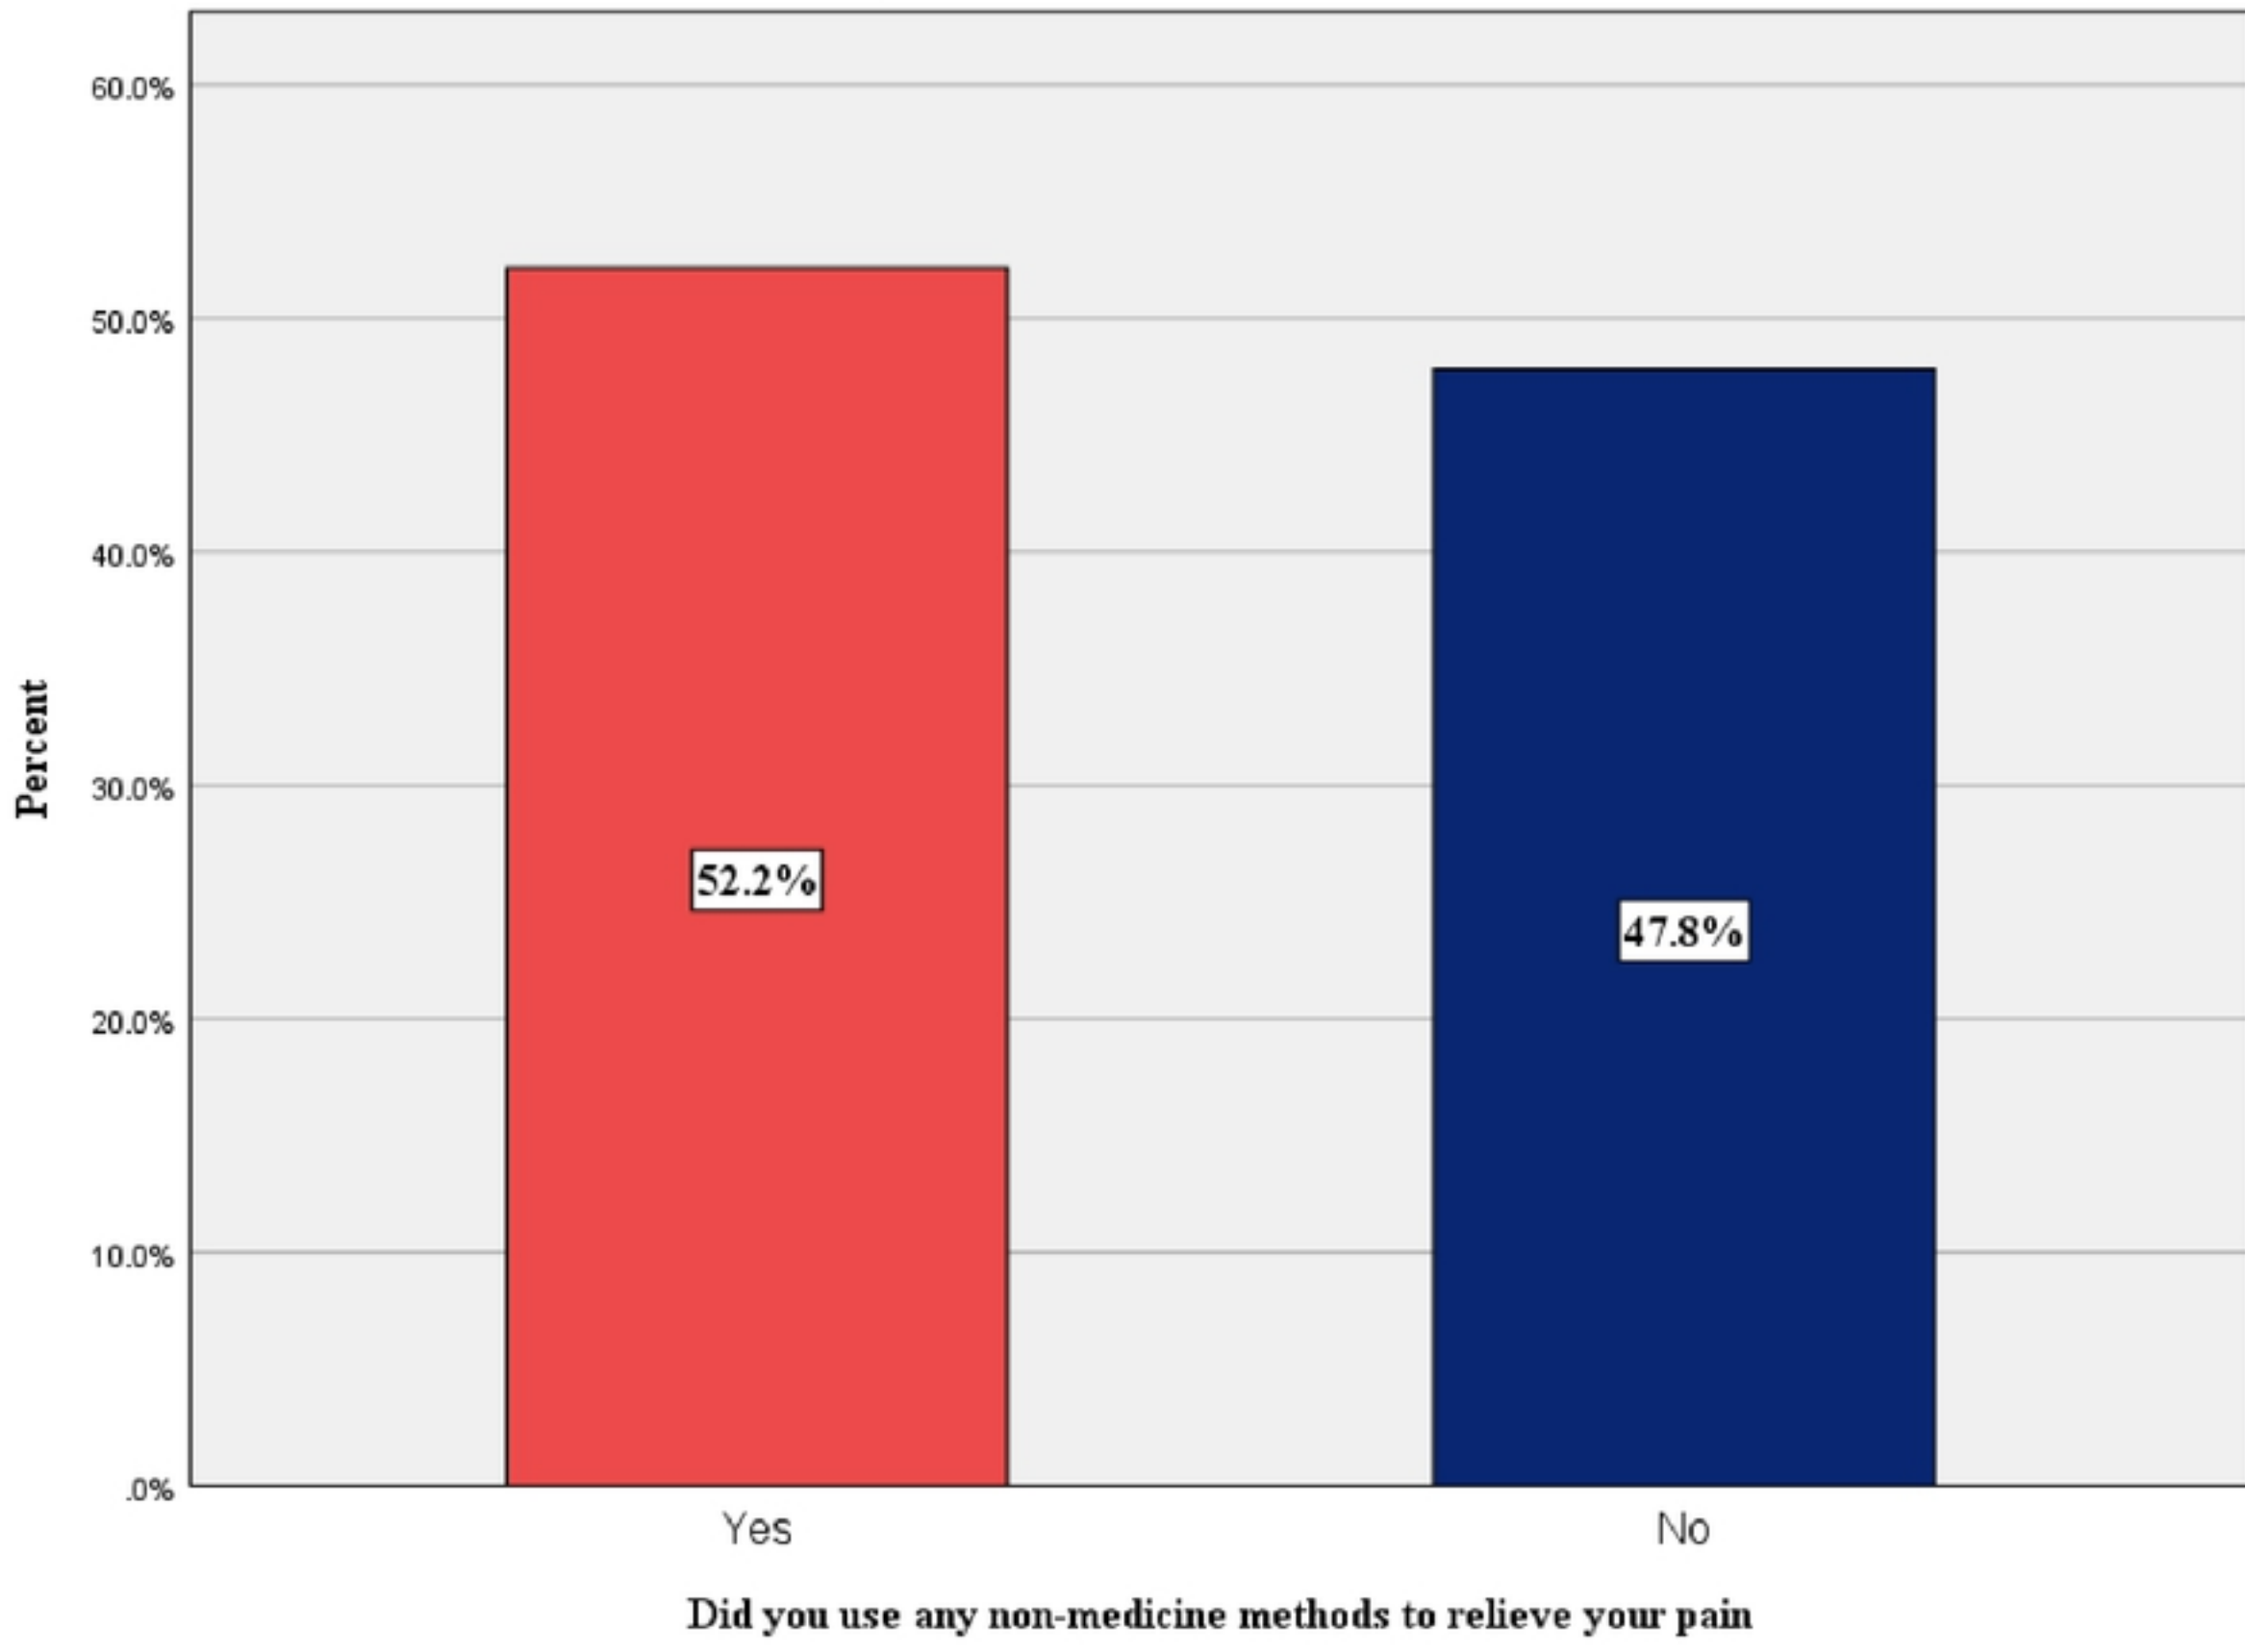

**Figure 1: Did you use any non-pharmacological methods to relieve your pain**

Figure
